# Supplementary material for: Co-Chaperone HSJ1a Dually Regulates the Proteasomal Degradation of Ataxin-3
Source: PubMed Central journal article supplement (PMC3098244; doi:10.1371/journal.pone.0019763), 2011-05-19
Supplement: pone.0019763.s005.pdf [file pone.0019763.s005.pdf]

**Figure S5**

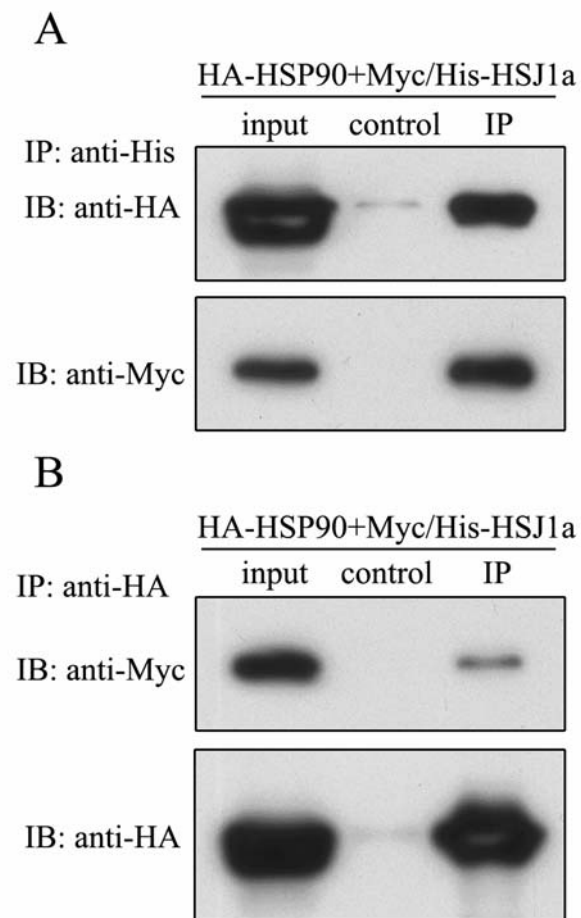

**Figure S5** Interaction between HSP90 and HSJ1a. (A) Co-IP experiment for interaction of HSJ1a with HSP90. The cell lysates with indicated proteins were subjected to co-IP with anti-His antibody and the resulting precipitates were subjected to immunoblotting with anti-HA (HSP90) and anti-Myc (HSJ1a) antibodies. (B) As (A), with anti-HA antibody for immunoprecipitation, and anti-Myc (HSJ1a) and anti-HA (HSP90) antibodies for immunoblotting.
