# Supplementary material for: Co-Chaperone HSJ1a Dually Regulates the Proteasomal Degradation of Ataxin-3
Source: PubMed Central journal article supplement (PMC3098244; doi:10.1371/journal.pone.0019763), 2011-05-19
Supplement: pone.0019763.s006.pdf [file pone.0019763.s006.pdf]

**Figure S6**

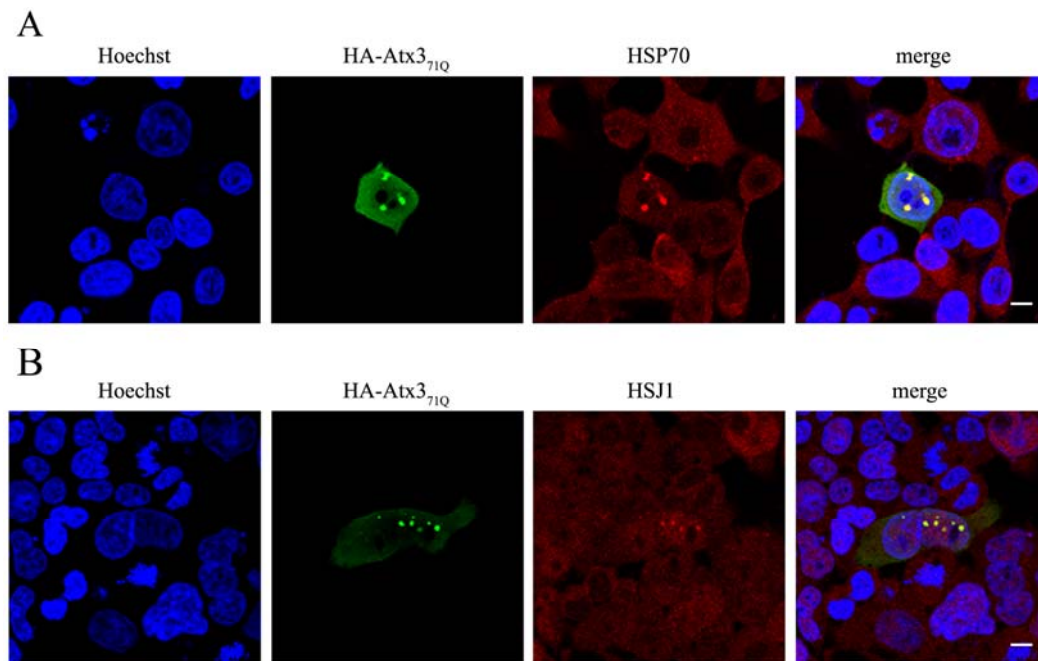

**Figure S6** Co-localization of the inclusion bodies formed by polyQ-expanded Atx3 with endogenous HSP70 or HSJ1a. HEK 293T cells were transiently transfected with the vector expressing HA-Atx3<sub>71Q</sub>. After 48 hrs, the cells were subjected to immuno-fluorescence staining with anti-HSP70 (red) or anti-HSJ1a (red) and anti-HA (green) antibodies. Nuclei are stained with Hoechst (blue). Scale bar = 20  $\mu$ m.
