# Supplementary material for: Co-Chaperone HSJ1a Dually Regulates the Proteasomal Degradation of Ataxin-3
Source: PubMed Central journal article supplement (PMC3098244; doi:10.1371/journal.pone.0019763), 2011-05-19
Supplement: pone.0019763.s007.pdf [file pone.0019763.s007.pdf]

**Figure S7**

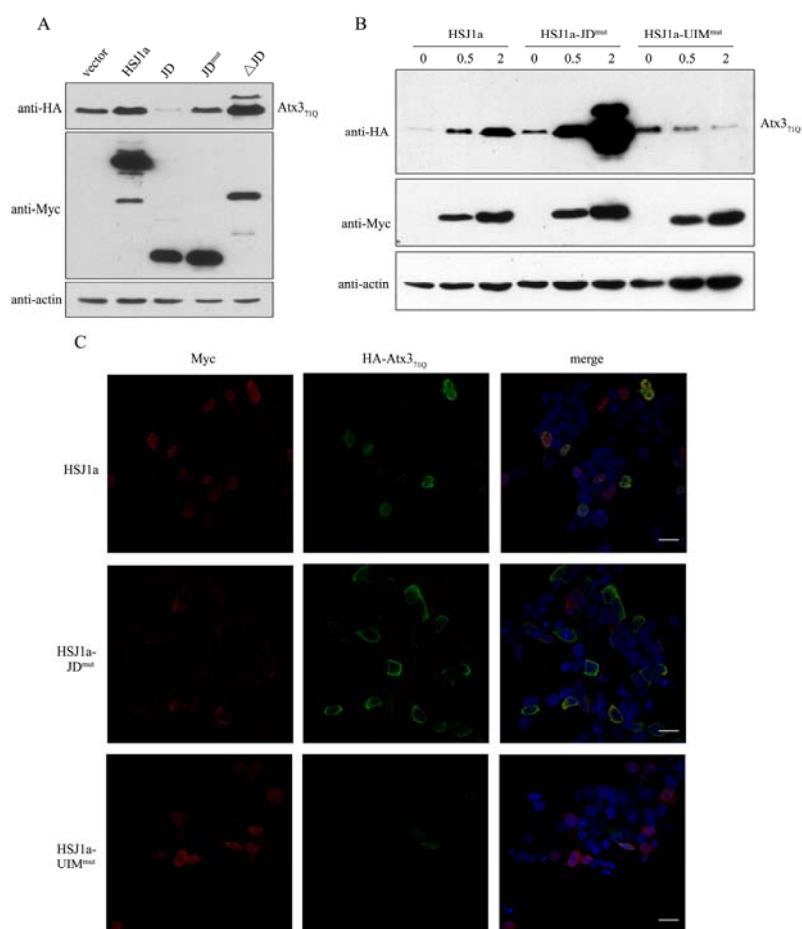

**Figure S7** Effects of HSJ1a and its mutants on the protein levels of polyQ-expanded Atx3. (A) Effects of HSJ1a and its fragments on the protein levels of Atx3<sub>71Q</sub>. HA-tagged Atx3<sub>71Q</sub> were co-transfected with Myc-HSJ1a or its fragments in HEK 293T cells. About 48 hrs after transfection, the cell lysates were subjected to immunoblotting with anti-HA, anti-Myc and anti-actin antibodies. Atx3<sub>71Q</sub>, polyQ-expanded Atx3 with 71 Gln residues. (B) Effects of HSJ1a and its mutants on the Atx3<sub>71Q</sub> levels in a dose-dependent manner. HA-Atx3<sub>71Q</sub> and different amounts of Myc-HSJ1a or its mutants were co-transfected into HEK 293T cells. The amounts of plasmid DNA are 0, 0.5 and 2 μg, respectively. (C) Immuno-fluorescence imaging of the cellular protein levels of Atx3<sub>71Q</sub> regulated by HSJ1a and its mutants. Atx3<sub>71Q</sub> is stained with anti-HA antibody (green), HSJ1a and its mutants are stained with anti-Myc antibody (red), and nuclei are stained with Hoechst (blue). Scale bar = 20 μm.
