# Supplementary material for: Co-Chaperone HSJ1a Dually Regulates the Proteasomal Degradation of Ataxin-3
Source: PubMed Central journal article supplement (PMC3098244; doi:10.1371/journal.pone.0019763), 2011-05-19
Supplement: pone.0019763.s008.pdf [file pone.0019763.s008.pdf]

**Figure S8**

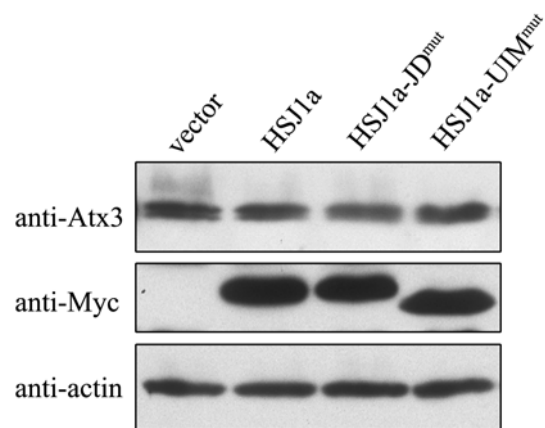

**Figure S8** HSJ1a and its mutants exert no effect on the protein level of endogenous Atx3. Myc-tagged HSJ1a, HSJ1a-JD<sup>mut</sup>, HSJ1a-UIM<sup>mut</sup> and empty vector were transfected into HEK 293T cells. About 48 hrs after transfection, the cell lysates were subjected to immunoblotting with anti-Atx3, anti-Myc and anti-actin antibodies.
