# Supplementary material for: Co-Chaperone HSJ1a Dually Regulates the Proteasomal Degradation of Ataxin-3
Source: PubMed Central journal article supplement (PMC3098244; doi:10.1371/journal.pone.0019763), 2011-05-19
Supplement: pone.0019763.s009.pdf [file pone.0019763.s009.pdf]

**Figure S9**

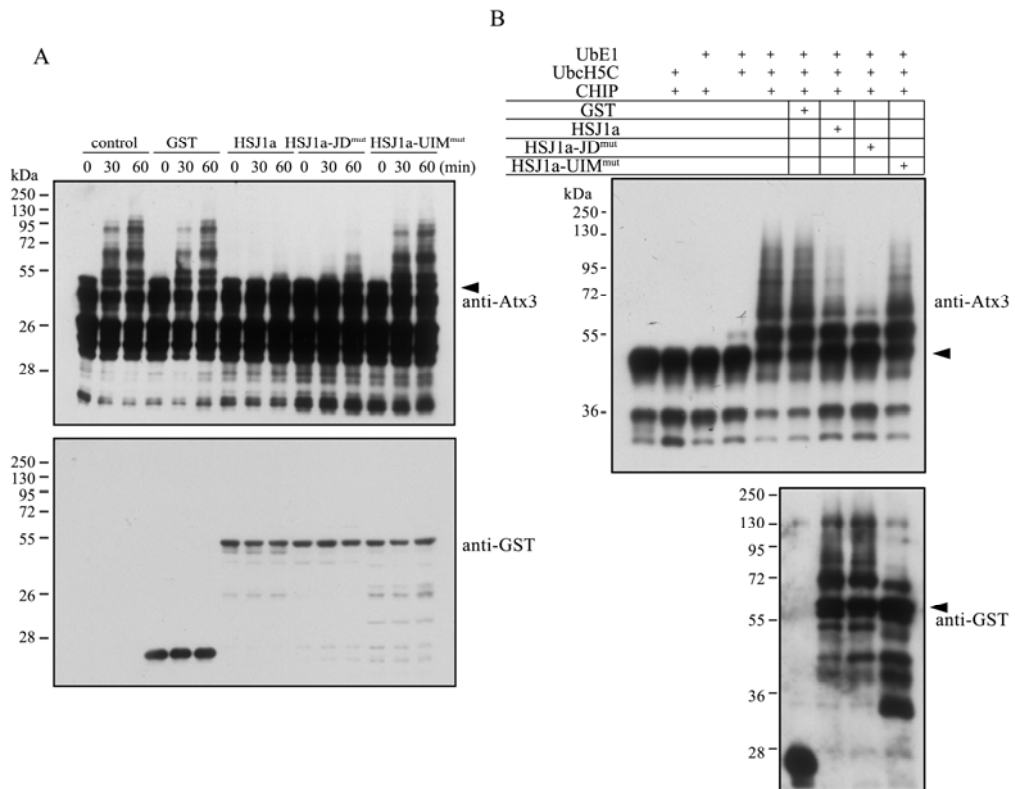

**Figure S9** Ubiquitination of Atx3 in an *in vitro* system. (A) The ubiquitination of Atx3 was performed in a reaction mixture of Ube1, UbcH5C, Ub, ATP, and the HEK 293T cell lysates containing GST, GST-HSJ1a or its mutants. Atx3 and its ubiquitinated forms were detected by immunoblotting with an anti-Atx3 antibody. (B) The ubiquitination of Atx3 was performed in a reaction mixture of purified proteins as indicated. The reaction products were detected as in (A). The arrows denote the bands of Atx3 and HSJ1a without ubiquitination.
